# Supplementary material for: Dissecting the Functional Mechanisms of Somatic Copy-Number Alterations Based on Dysregulated ceRNA Networks across Cancers
Source: PubMed Central journal article supplement — Mol Ther Nucleic Acids. 2020 Jun 18;21:464–79. doi: 10.1016/j.omtn.2020.06.012 (PMC7358224; doi:10.1016/j.omtn.2020.06.012), 2020-06-18
Supplement: mmc1.pdf [file mmc1.pdf]

**OMTN, Volume 21**

**Supplemental Information**

**Dissecting the Functional Mechanisms  
of Somatic Copy-Number Alterations Based  
on Dysregulated ceRNA Networks across Cancers**

**Yanyan Ping, Yao Zhou, Jing Hu, Lin Pang, Chaohan Xu, and Yun Xiao**

## Supplemental Figures

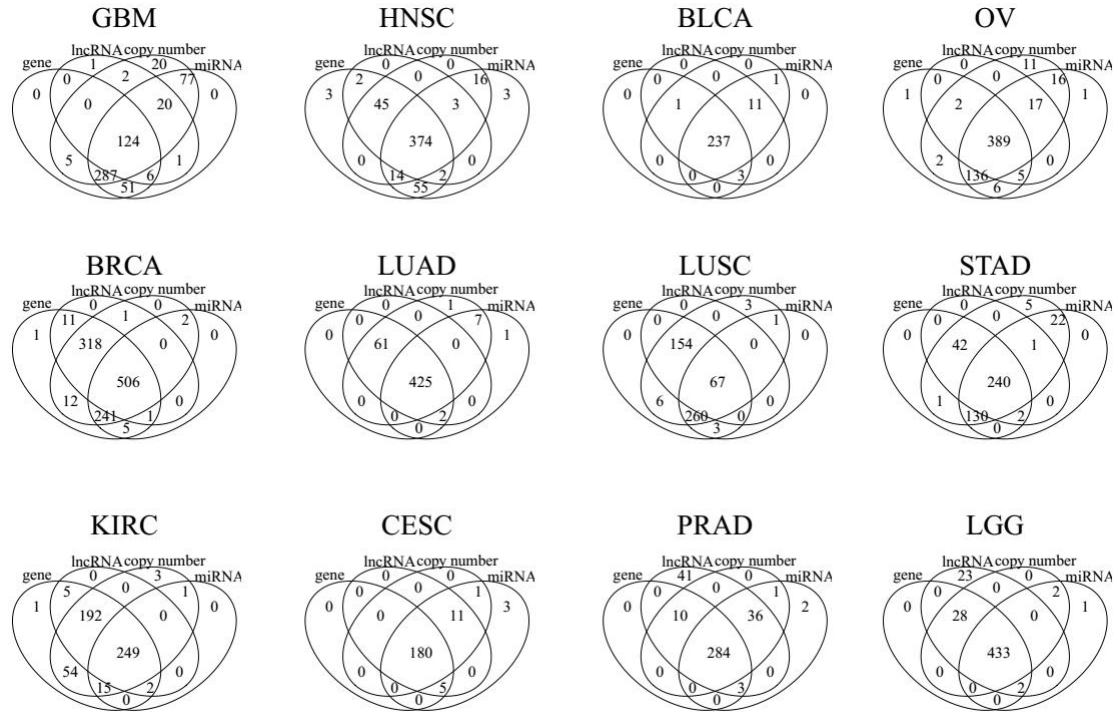

**Figure S1.** The overlaps of tumor patients among expression profiles of lncRNA, PGs and miRNAs and copy number profiles in 12 cancer types.

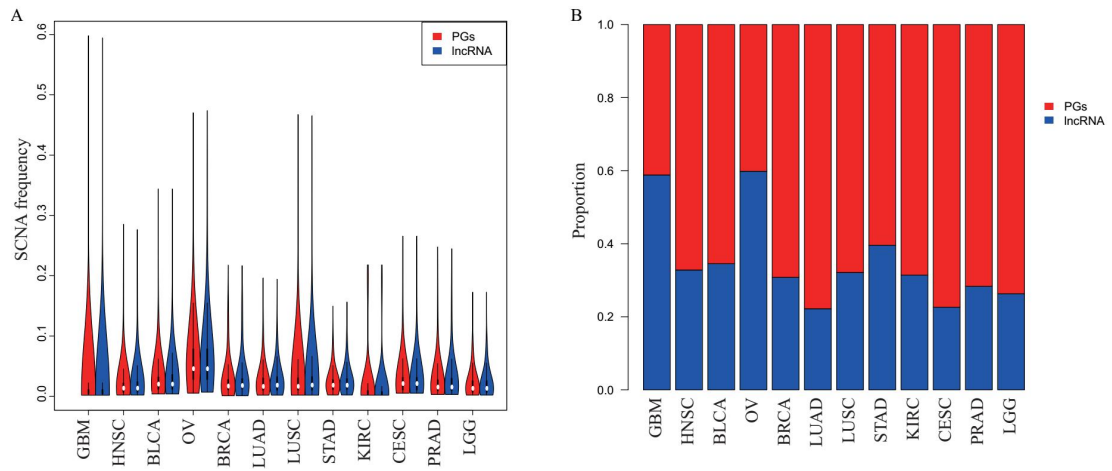

**Figure S2.** The SCNAs of lncRNA were prevailing in cancers. **A.** The SCNA frequencies of PGs and lncRNAs across cancers. **B.** The proportions of PGs and lncRNAs in candidate genes cross 12 cancer types.

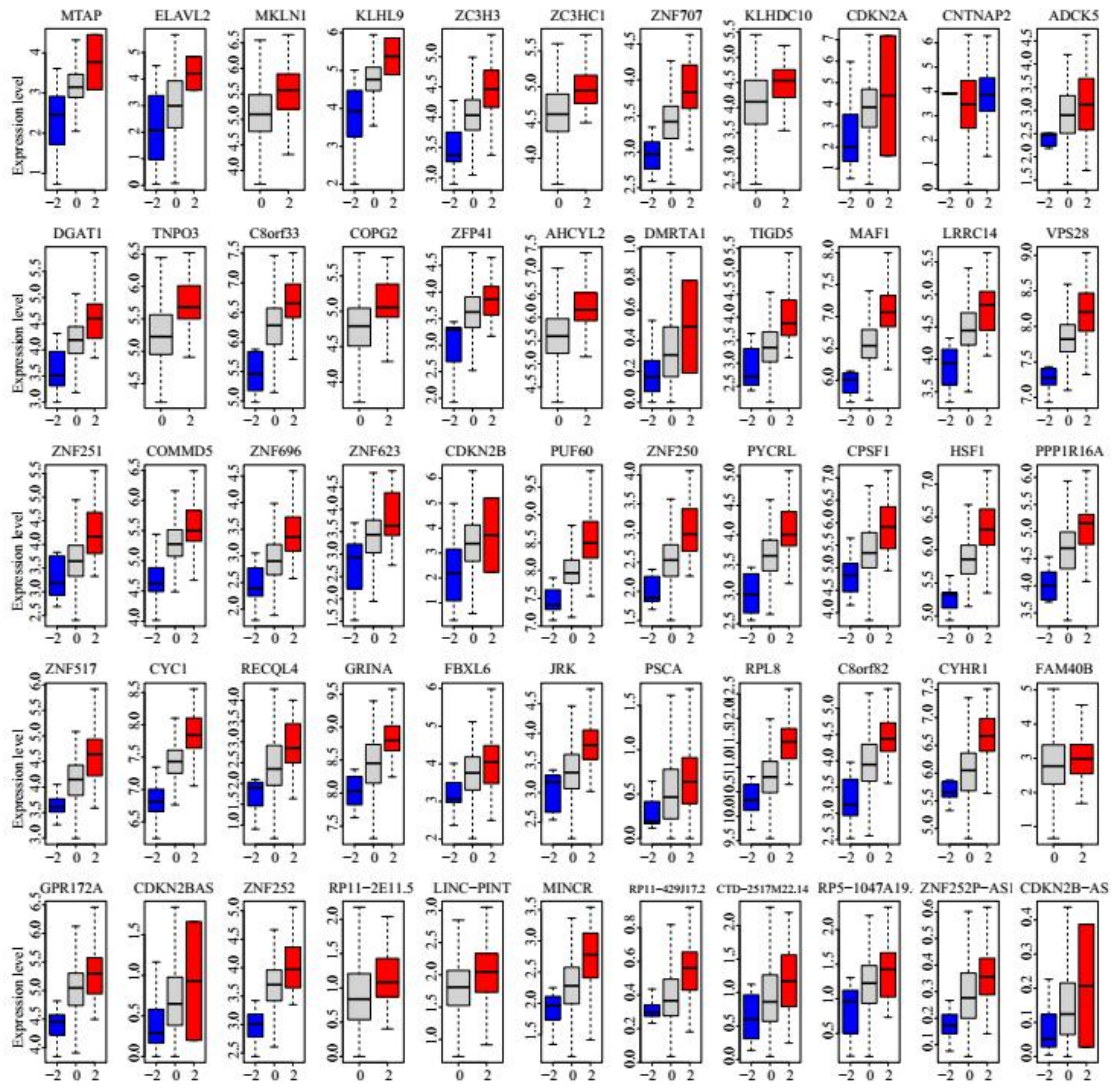

**Figure S3.** SCNAs of 55 candidate genes significantly and accordantly influenced their expression levels in LGG. -2 represents for homozygous deletion (blue), 0 for non-alteration (gray) and 2 for high-level amplification (red).

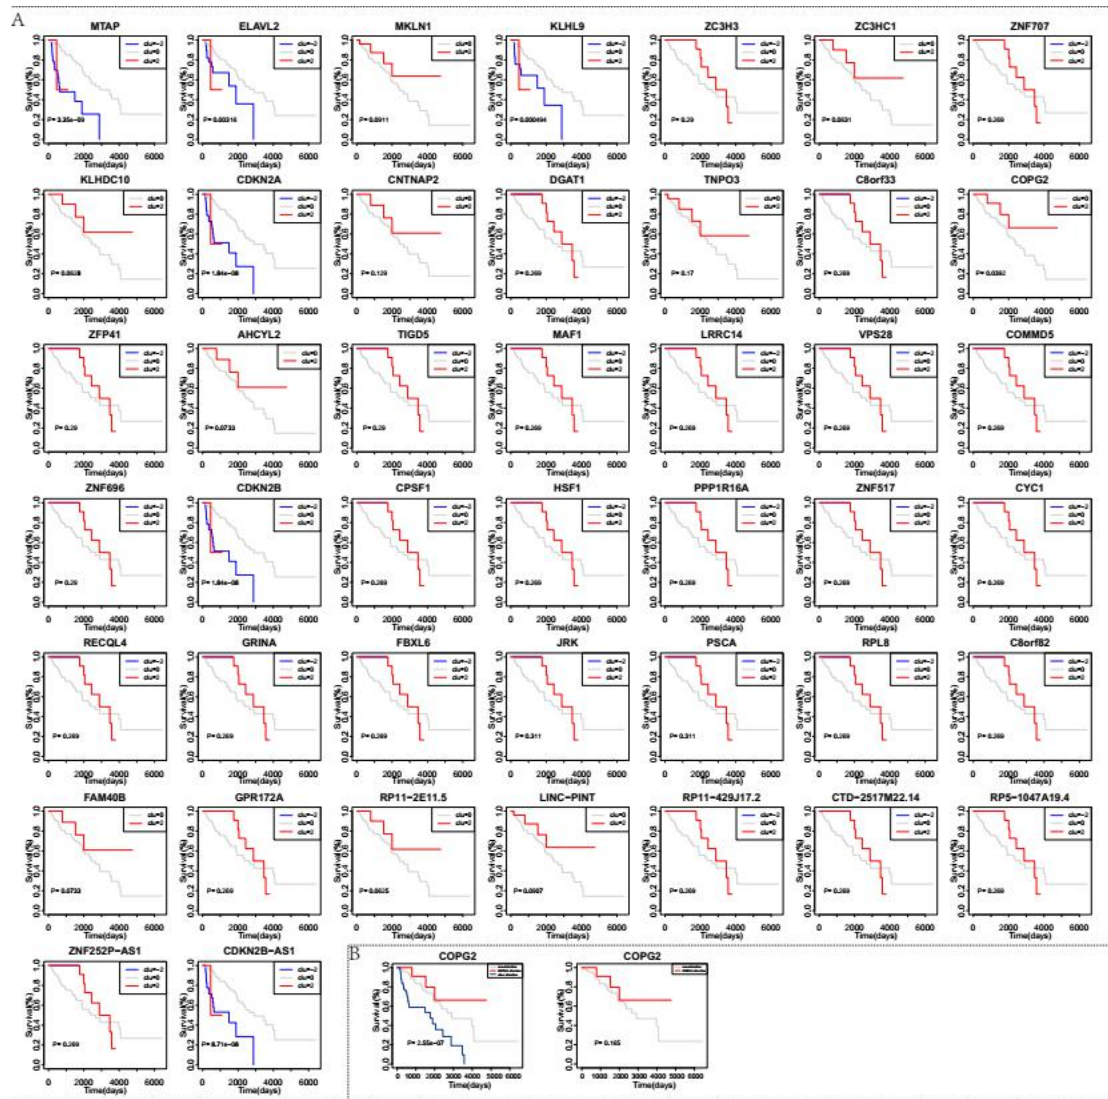

**Figure S4.** Survival analysis of 44 driver genes in LGG. A. The associations of SCNA status of 44 driver genes with LGG prognosis. -2 represents for homozygous deletion (blue), 0 for non-alteration (gray) and 2 for high-level amplification (red). B. COPG2 amplification was not an independent prognostic factor in LGG.

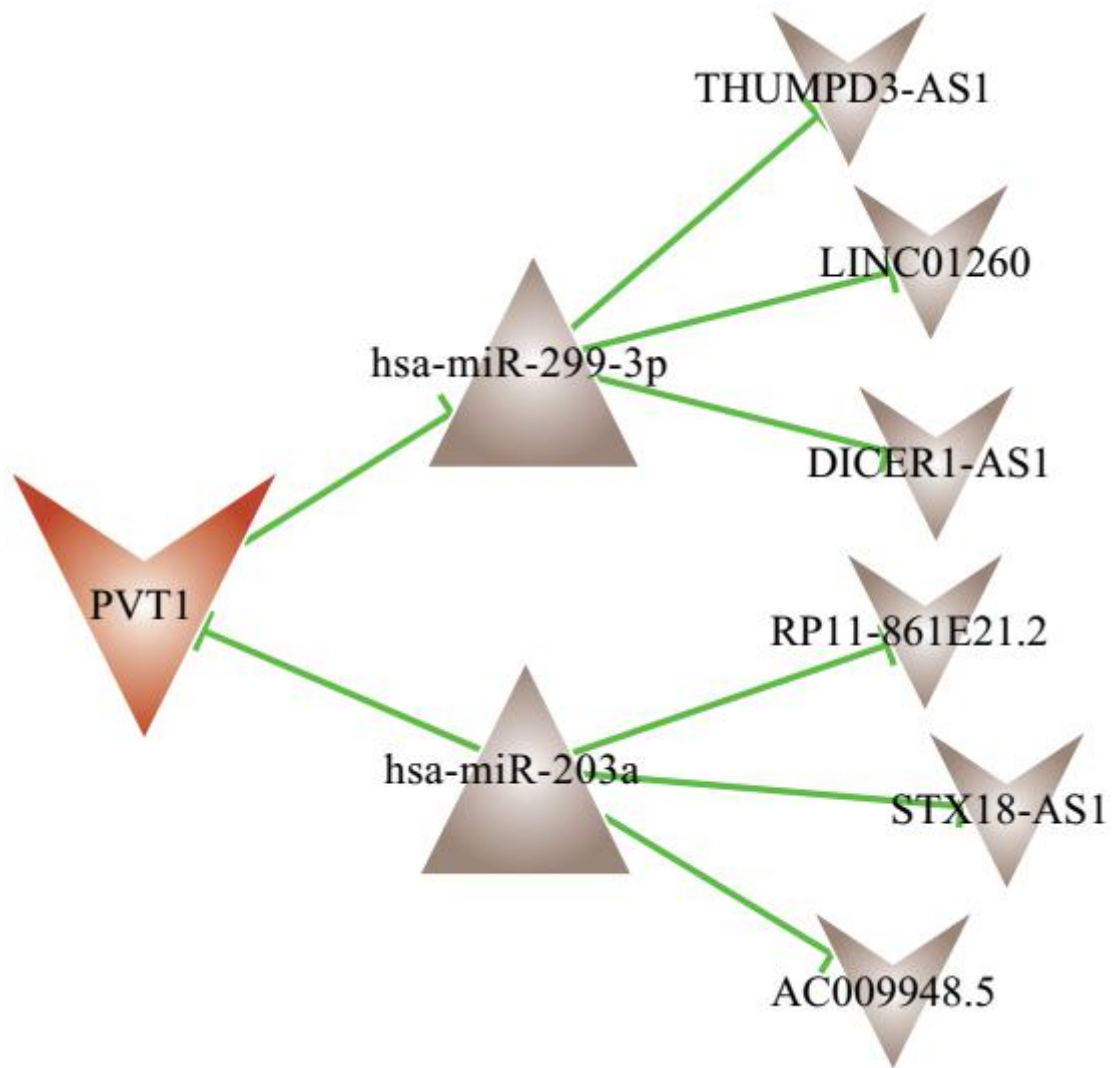

**Figure S5.** PVT1 amplification-driven dysregulated ceRNA network in OV.



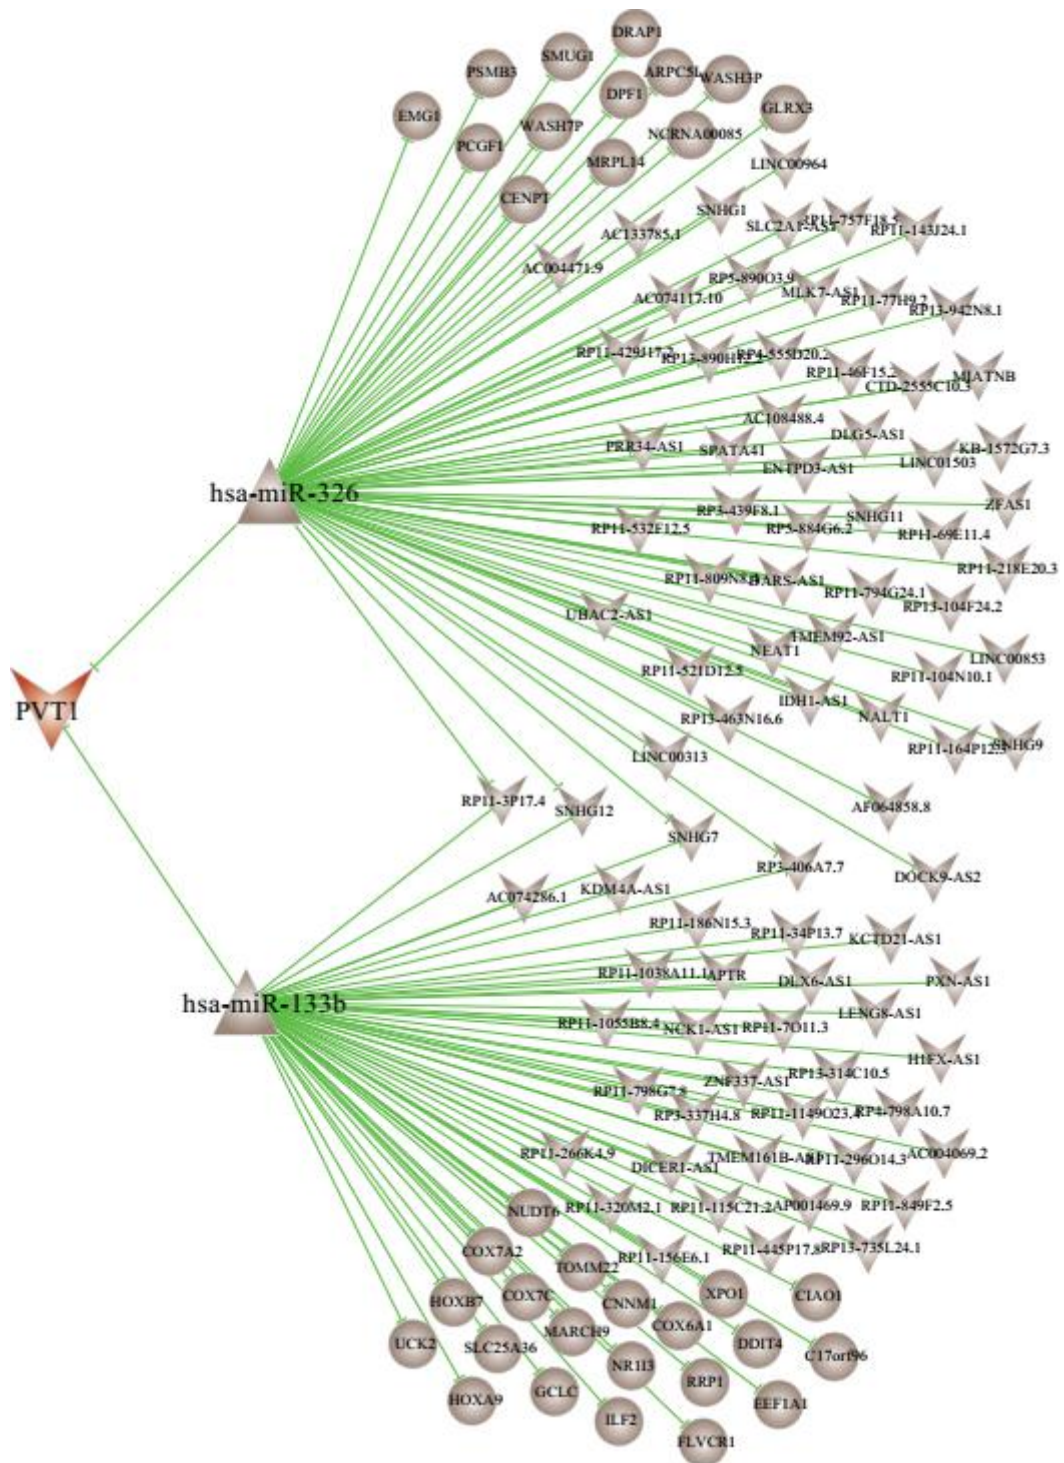

**Figure S6.** PVT1 amplification-driven dysregulated ceRNA network in HNSC.

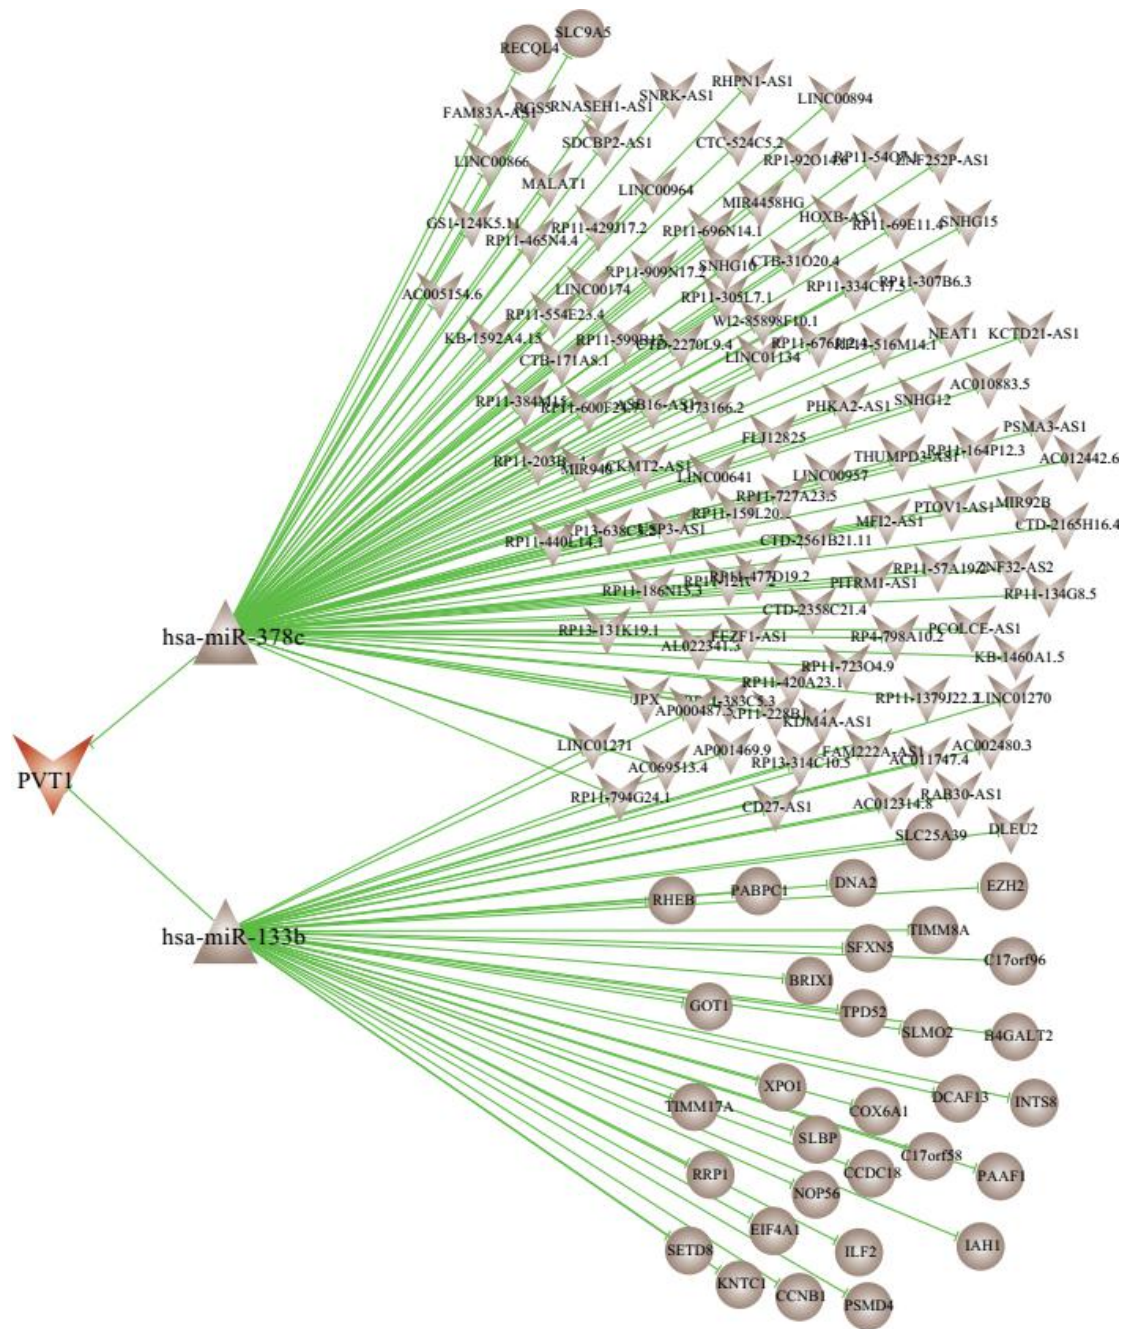

**Figure S7.** PVT1 amplification-driven dysregulated ceRNA network in LUAD.



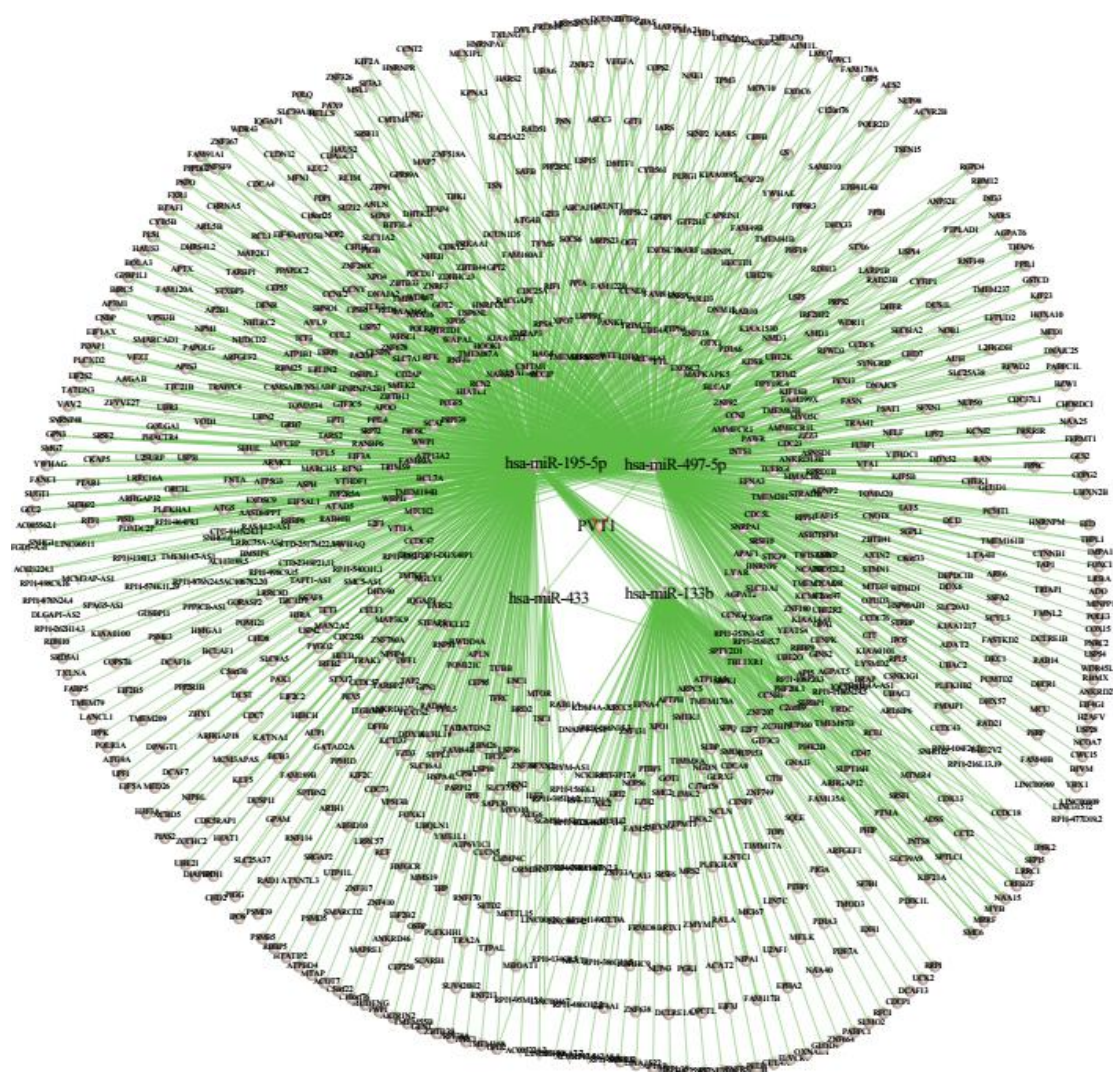

Figure S8. PVT1 amplification-driven dysregulated ceRNA network in STAD.

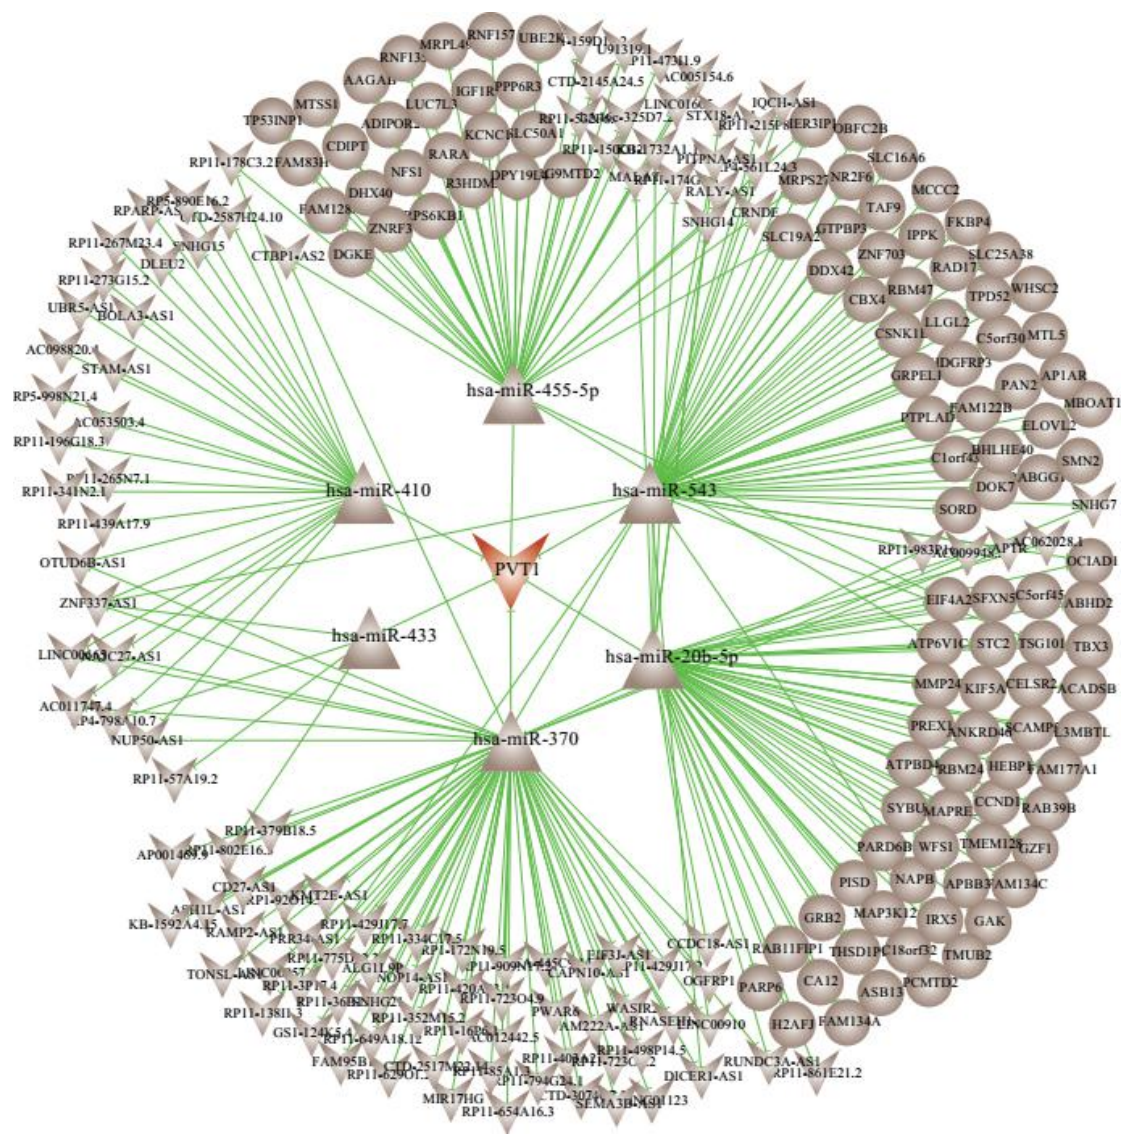

**Figure S9.** PVT1 amplification-driven dysregulated ceRNA network in BRCA.



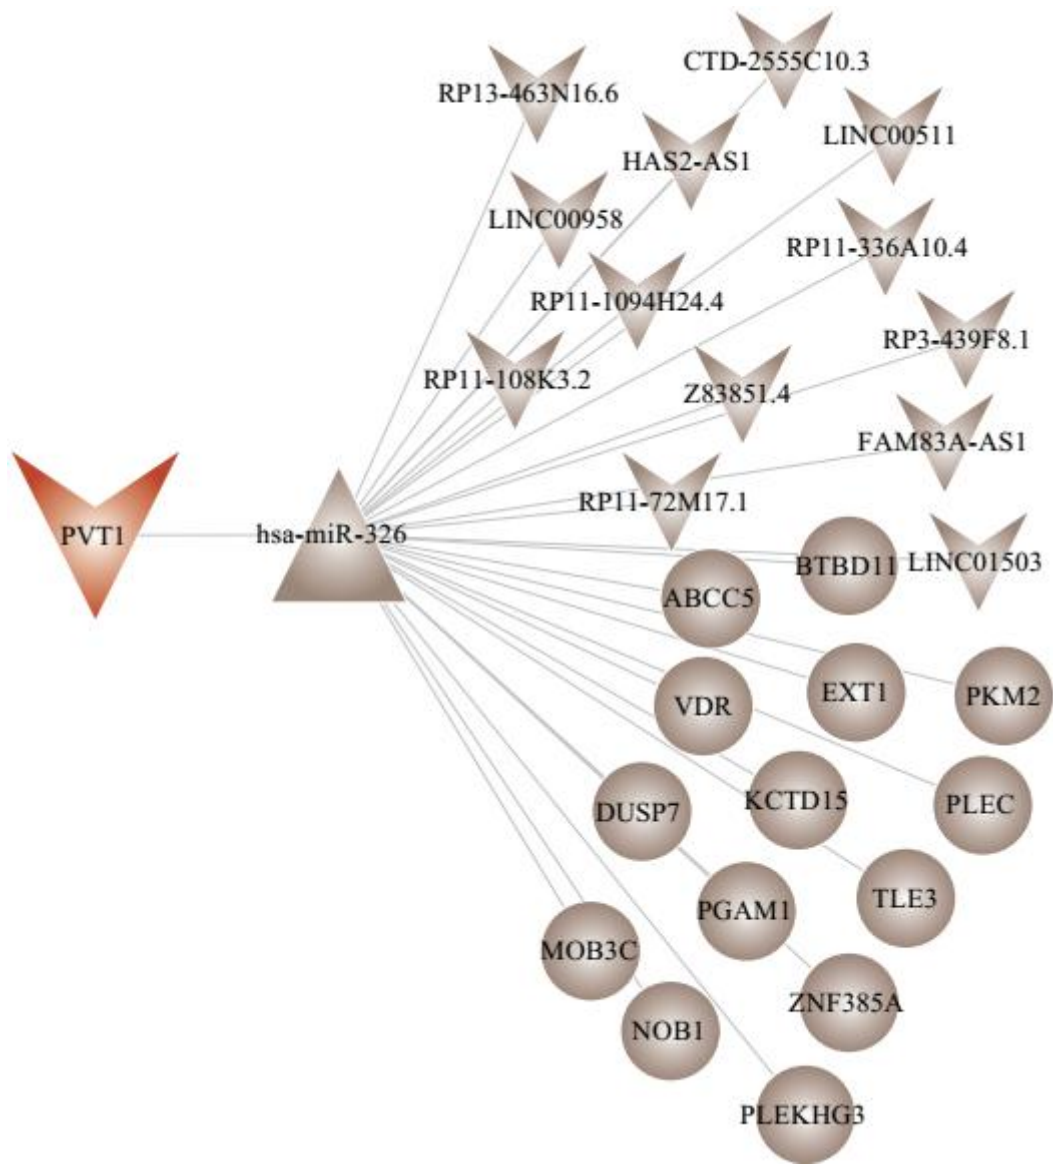

**Figure S10.** PVT1 amplification-driven dysregulated ceRNA network in BLCA.

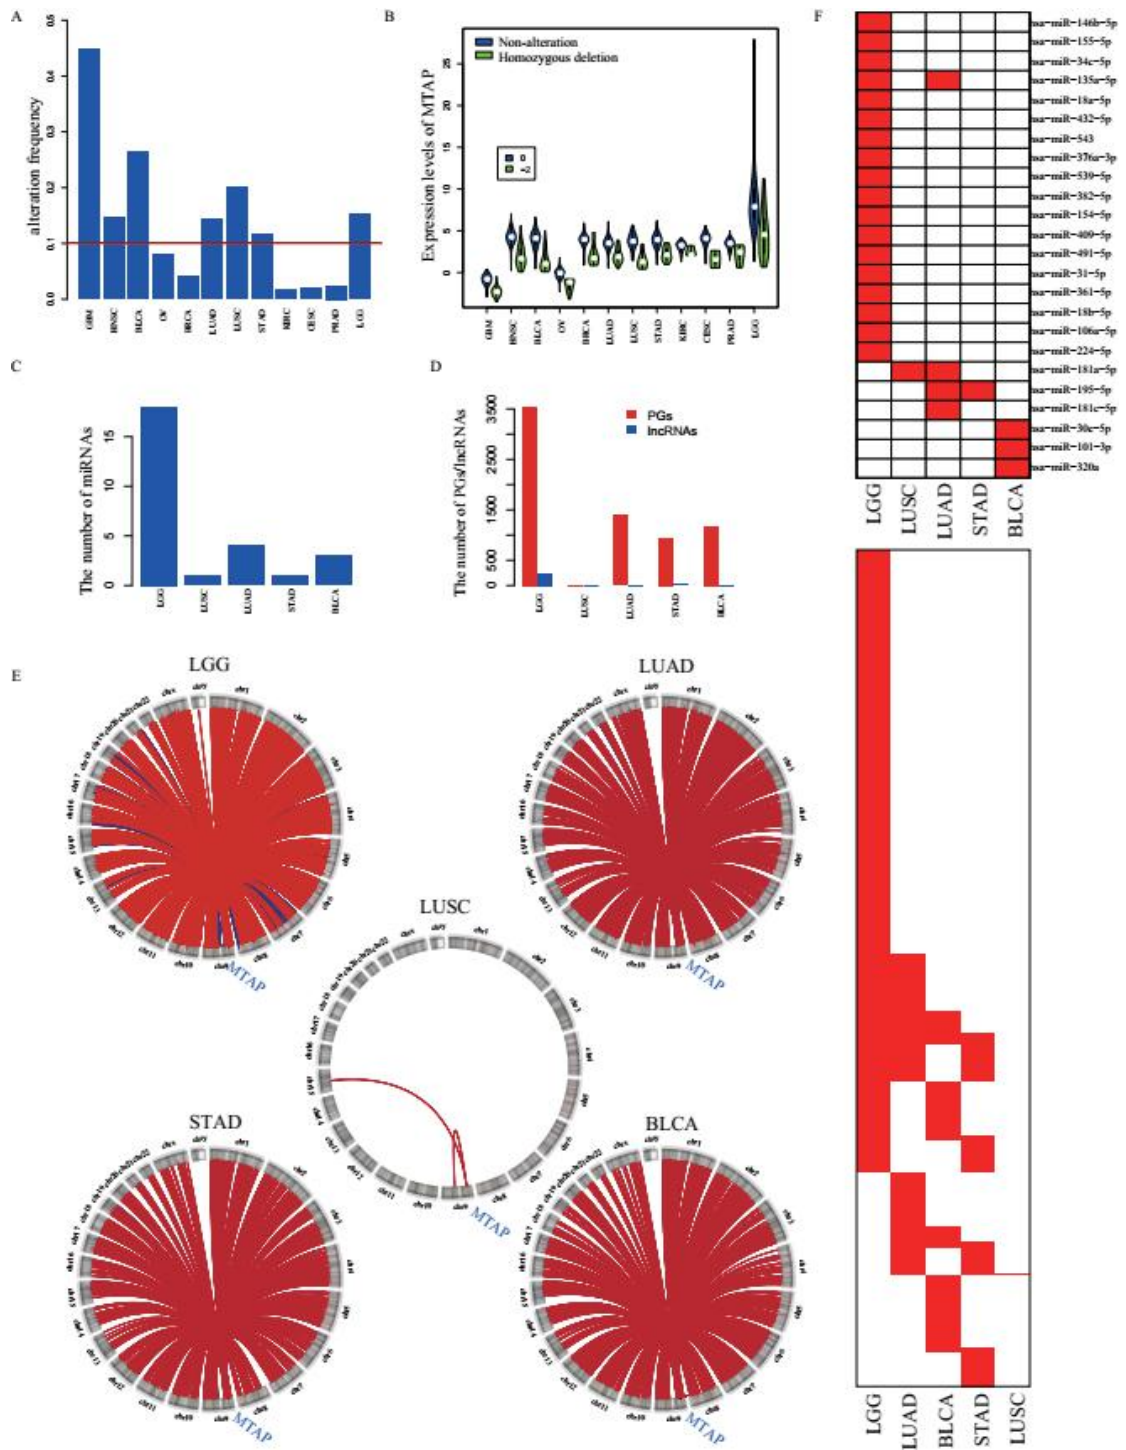

**Figure S11.** Homozygous deletion of MTAP disturbed distinct different ceRNA networks in different cancers. **A.** Alteration frequency of MTAP in 12 cancer types. **B.** Homozygous deletion of MTAP significantly down-regulated the MTAP expression levels in 12 cancer types. **C.** The numbers of miRNAs in MTAP homozygous deletion-induced dysregulated ceRNA networks in five types of cancers including LGG, LUSC, LUAD, STAD, BLCA. **D.** The numbers of PGs and lncRNAs in MTAP-mediated dysregulated ceRNA networks in five types of cancers. **E.** Genome-wide view of

active ceRNA partners of MTAP in different cancers. Blue, lncRNA; Red, PGs. F. Heatmap for miRNAs in MTAP-mediated dysregulated ceRNA networks in five types of cancers. G. Heatmap for ceRNAs of MTAP in MTAP-mediated dysregulated ceRNA networks in five types of cancers.



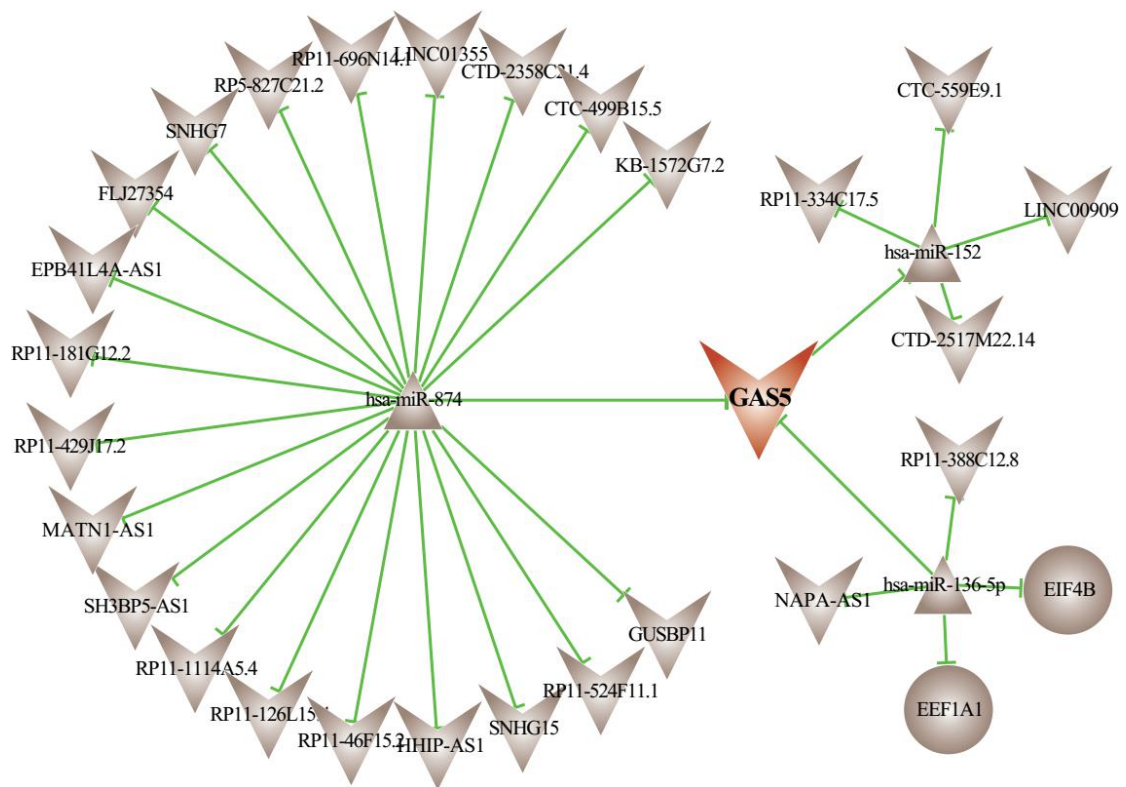

**Figure S12.** GAS5 amplification-driven dysregulated ceRNA network in BRCA.

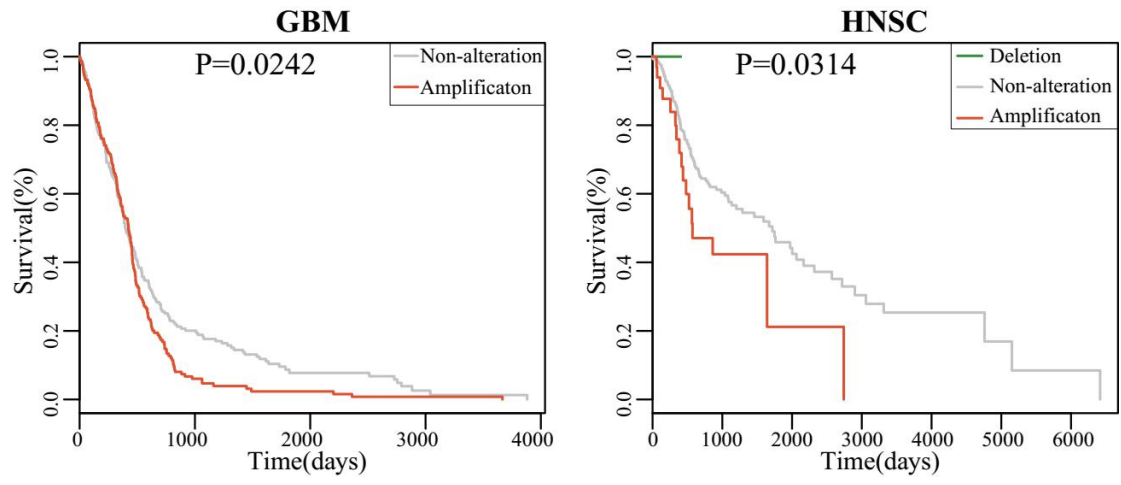

**Figure S13.** The EGFR amplification were associated with poor prognosis of GBM and HNSC.

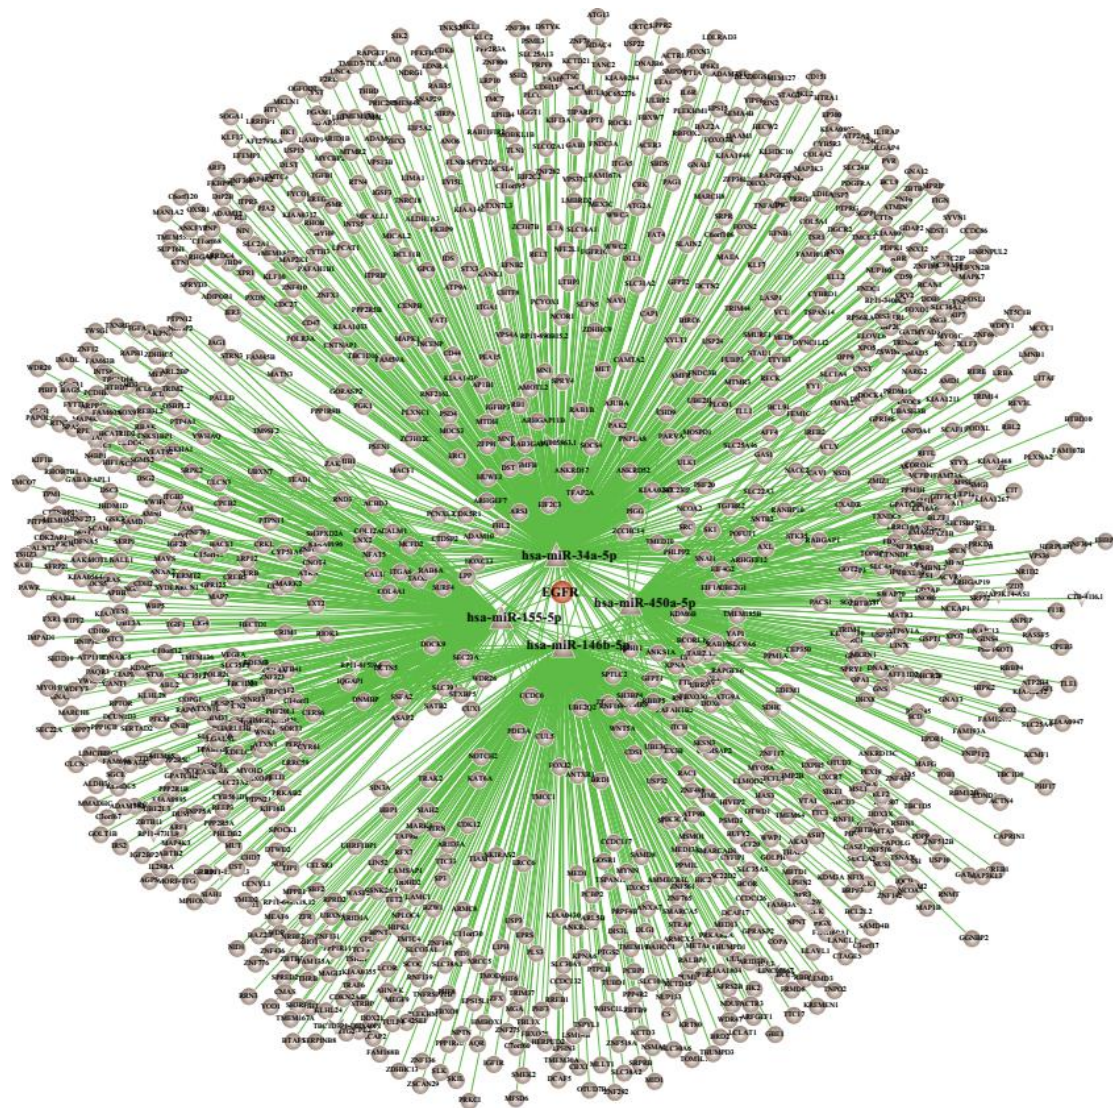

Figure S14. EGFR amplification-driven dysregulated ceRNA network in HNSC.

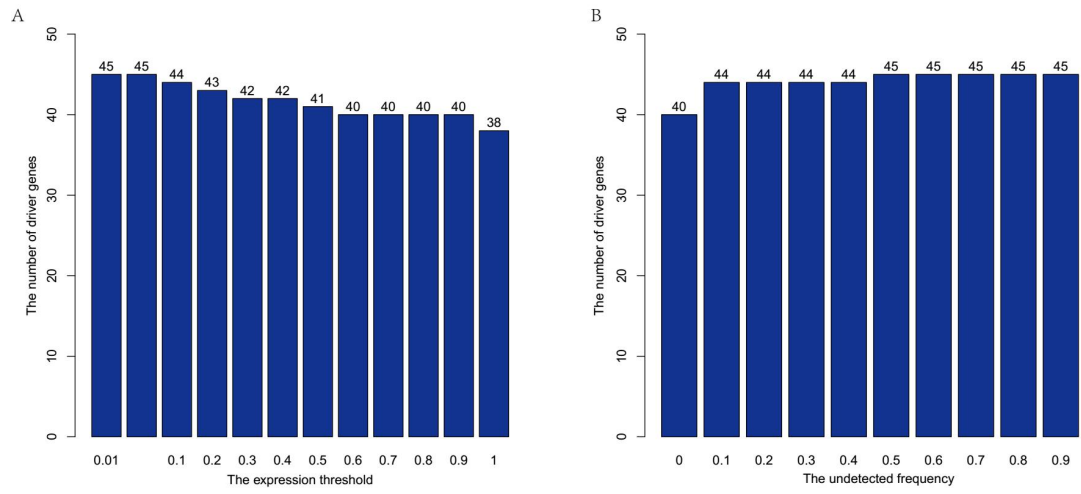

**Figure S15.** The influence of thresholds of mean expression and undetected frequency on the method for identifying driver genes. A. The number of driver genes identified at different threshold of mean expression. B. The number of driver genes identified as different threshold of undetected frequency.

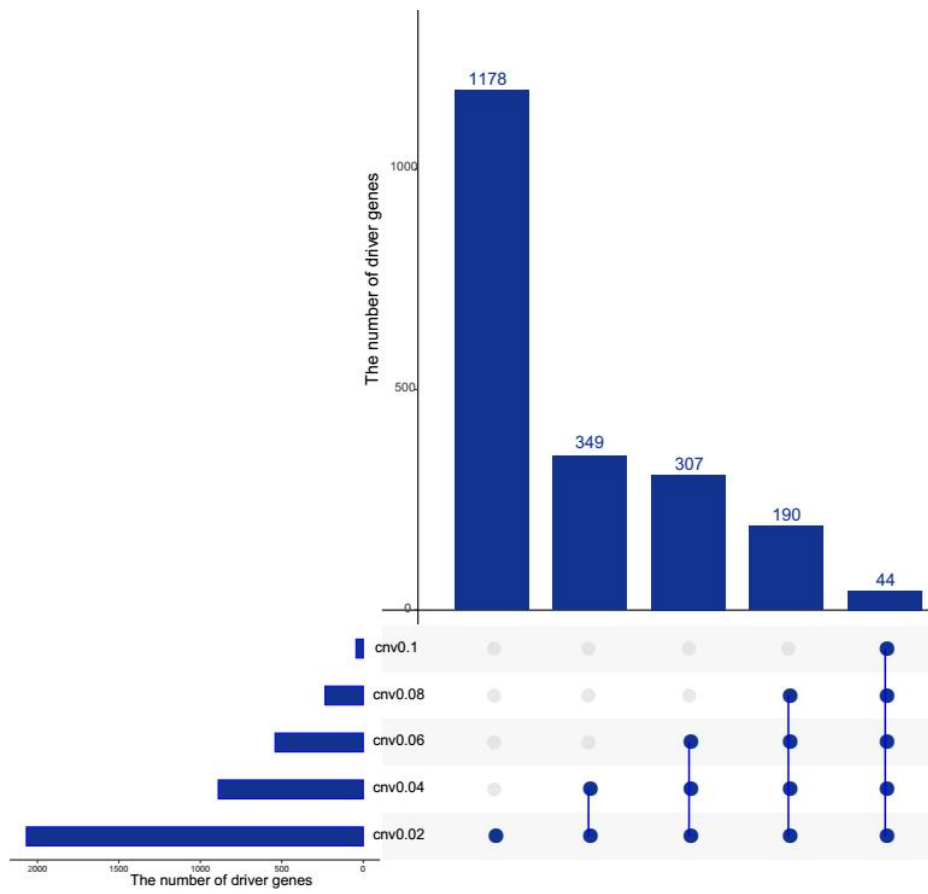

**Figure S16.** The overlaps of driver genes identified by our method at different thresholds of SCNA frequencies.



## Supplemental Table

**Table S1.** The numbers of cancer samples in copy number profiles and expression profiles of PGs, lncRNAs and miRNAs for 12 cancer types

| Cancer type  | Expression profiles |        |       | Copy number profiles | Common samples |
|--------------|---------------------|--------|-------|----------------------|----------------|
|              | PG                  | lncRNA | miRNA |                      |                |
| <b>GBM</b>   | 473                 | 154    | 571   | 535                  | 124            |
| <b>HNSC</b>  | 495                 | 426    | 467   | 452                  | 374            |
| <b>BLCA</b>  | 241                 | 252    | 252   | 250                  | 237            |
| <b>LUAD</b>  | 488                 | 488    | 482   | 494                  | 425            |
| <b>OV</b>    | 541                 | 412    | 585   | 572                  | 389            |
| <b>BRCA</b>  | 1095                | 837    | 755   | 1080                 | 506            |
| <b>LUSC</b>  | 490                 | 220    | 331   | 490                  | 67             |
| <b>STAD</b>  | 415                 | 285    | 395   | 441                  | 240            |
| <b>KIRC</b>  | 518                 | 448    | 267   | 514                  | 249            |
| <b>CESC</b>  | 185                 | 196    | 200   | 192                  | 180            |
| <b>PRAD</b>  | 297                 | 374    | 326   | 331                  | 284            |
| <b>LGG</b>   | 463                 | 486    | 438   | 463                  | 433            |
| <b>Total</b> | 5701                | 4578   | 5069  | 5814                 | 3508           |
